# Supplementary material for: Simultaneous bioelectrochemical degradation of algae sludge and energy recovery in microbial fuel cells
Source: Royal Society of Chemistry journal article supplement (doi:10.1039/c2ra20631e), 2012-01-01
Supplement: c2ra20631e.pdf [file c2ra20631e.pdf]

Page: 2; Figure: 2

### **Supplementary materials**

**The following information is provided to the article in RCS Advance**

**“Simultaneous bioelectrochemical degradation of algae sludge  
and energy recovery in microbial fuel cells”**

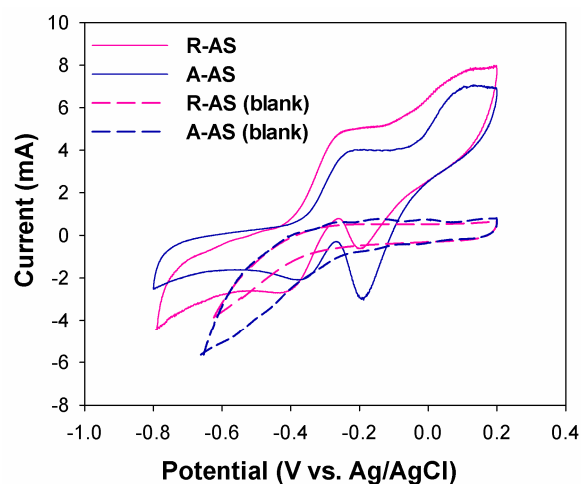

**Fig.S1** Cyclic voltammogram analysis of biofilm anodes in MFCs fed with R-AS and A-AS at scan rate of 1mV/s. New anodes without biofilm in MFCs fed with R-AS and A-AS were scanned as blank experiments.

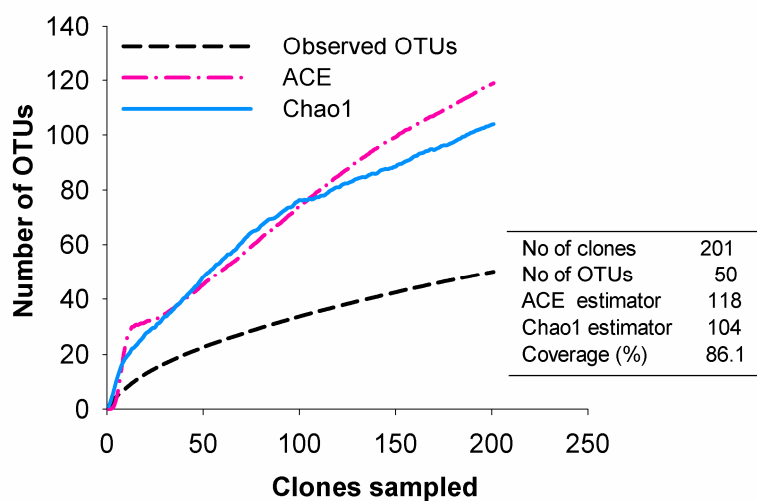

**Fig.S2** Rarefaction curves of observed and estimated (ACE and Chao1) phylotype richness from the 16S rRNA gene clone library. The OTU was defined by a 3% distance.
